# Supplementary material for: Topological modulation of the porous structure of a coordination polymer constructed from a flexible building block via framework–guest interaction during self-assembly
Source: Royal Society of Chemistry journal article supplement (doi:10.1039/c5ce01804h), 2016-01-01
Supplement: c5ce01804h1.pdf [file c5ce01804h1.pdf]

## Supporting Information

Topological modulation of the porous structure of a coordination polymer constructed from a flexible building block *via* framework–guest interaction during self-assembly

Atsuko Masuya-Suzuki,\* Nozomi Matsubara, Ryunosuke Karashimada, Hitoshi Hoshino and Nobuhiko Iki\*

Graduate School of Environmental Studies, Tohoku University, 6-6-07 Aramaki-aza Aoba, Aoba-ku, Sendai, Miyagi, 980-8579, Japan

\* To whom correspondence should be addressed. Fax: +81-22-795-7293, Email: masuya@analchem.che.tohoku.ac.jp, iki@m.tohoku.ac.jp

### Contents

#### 1. Experimental Details

#### 2. Additional Data

## 1. Experimental Details

**Materials.** Samarium (III) nitrate hexahydrate [ $\text{Sm}(\text{NO}_3)_3 \cdot 6\text{H}_2\text{O}$ ] was purchased from Kanto Chemical Co., Inc. Tris(2-aminoethyl)amine (tren) and 5-methylsalicylaldehyde (5-MeSal) were purchased from Tokyo Chemical Industry Co., Ltd. All reagents were used without further purification.

**Synthesis of the coordination polymer 1.** A solution of tren (0.0728 g, 0.5 mmol) dissolved in methanol (2 mL) was added to a hot solution of  $\text{Sm}(\text{NO}_3)_3 \cdot 6\text{H}_2\text{O}$  (0.2278 g, 0.5 mmol) dissolved in methanol (13 mL) and stirred for 10 min at 60 °C. Then, a solution of 5-MeSal (0.2185 g, 1.5 mmol) dissolved in methanol (2 mL) was added and stirred for 5 min at 60 °C. After the solution was cooled at room temperature for 2 h, a yellow product was obtained. Recrystallization from DMF afforded single crystals. Yield: 0.273 g, 60.2 %.

$[\text{Sm}(\text{H}_3\text{L})(\text{NO}_3)_3 \cdot \text{DMF} \cdot 1/6\text{H}_2\text{O}]_n$  (**1**). Anal. Calc. for  $\text{C}_{33}\text{H}_{43.33}\text{N}_8\text{O}_{13.17}\text{Sm}$ : C 43.40, H 4.78, N 12.27. Found: C 43.40, H 4.64, N 12.03. IR ( $\text{cm}^{-1}$ ): 2918(m), 2859(m), 1677(m), 1649(s), 1535(m), 1485(s), 1440(m), 1383(m), 1335(m), 1273(s), 1225(m), 1210(s), 1160(s), 1140(m), 1093(w), 1066(m), 1024(s), 939(w), 921(m), 890(w), 870(m), 826(m), 800(s), 735(m), 705(w), 660(m).

**Synthesis of the coordination polymer 2.** A solution of tren (0.7360 g, 5 mmol) dissolved in methanol (20 mL) was added to a hot solution of  $\text{Sm}(\text{NO}_3)_3 \cdot 6\text{H}_2\text{O}$  (2.2747 g, 5 mmol) dissolved in methanol (130 mL) and stirred for 10 min at 60 °C. Then, a solution of 5-MeSal (2.050 g, 15 mmol) dissolved in methanol (20 mL) was added and stirred for 5 min at 60 °C. After the solution was cooled at room temperature for 2 h, a yellow product was obtained. Recrystallization by diffusion of methanol vapor into DMF solution afforded single crystals. Yield: 3.021 g, 71.1 %.

$[\text{Sm}(\text{H}_3\text{L})(\text{NO}_3)_3 \cdot 1/3\text{MeOH} \cdot 1/6\text{H}_2\text{O}]_n$  (**2**). Anal. Calc. for  $\text{C}_{30.17}\text{H}_{36}\text{N}_7\text{O}_{12.5}\text{Sm}$ : C 42.83, H 4.46, N 11.53. Found: C 43.04, H 4.59, N 11.78. IR ( $\text{cm}^{-1}$ ): 2919(m), 2857(m), 1677(m), 1648(s), 1535(m), 1485(s), 1383(m), 1335(m), 1271(s), 1225(m), 1210(s), 1160(s), 1140(m), 1065(m), 1025(s), 939(w), 922(m), 890(w), 867(m), 835(m), 800(s), 734(m), 705(w), 660(w).

**Physical measurements.** Elemental analysis was performed with a J-Science Lab NM-11. IR spectra were recorded with a Nicolet 6700 FT-IR spectrometer in the 4000–650  $\text{cm}^{-1}$  region employing attenuated total reflectance mode. Powder X-ray diffraction (PXRD) was

recorded using RINT-2200VHF (Rigaku). Simulation of X-ray diffraction patterns with the CIF files of the corresponding single-crystal X-ray diffraction data were conducted with CrystalDiffract. Thermogravimetric analysis (TGA) was performed by TG/DTA 6200 (Seiko Instruments Inc.). The powders of **1** and **2** were treated at 120 °C under reduced pressure for 12 h for gas adsorption study. N<sub>2</sub> adsorption isotherms of **1** and **2** were measured by NOVA-4200e (Quantachrome Instruments).

**X-ray crystallographic data collection and refinement of the structure.** Single-crystal X-ray diffraction data were collected on a Bruker AXS II CCD diffractometer using MoK $\alpha$  radiation ( $\lambda = 0.71073$  Å) and employing a Bruker Helios multilayered confocal mirror as a monochromator and Bruker TXS fine-focus rotating anode as a radiation source. The data were integrated and reduced using SAINT and XPREP, and absorption corrections were made using the semi-empirical method with SADABS.<sup>1</sup> The structure was solved by the direct method using SHELXS-97<sup>2</sup> and refined using least-squares methods on  $F^2$  with SHELXL-97. All non-hydrogen atoms were refined anisotropically, and hydrogen atoms bound to carbon atoms were placed at the calculated positions. Hydrogen atoms bound to the nitrogen atoms were found as follows. The final difference Fourier map showed peaks in the expected positions for hydrogen atoms with an identical N–H distance; however, they did not converge into the expected N–H distances upon refinement with the isotropic temperature factors. Thus, the positions were fixed in the amide geometry (N–H = 0.88 Å), and only the temperature factors were refined, proving the existence of the hydrogen atom located at the nitrogen atom. The structures of **1** and **2** contained disordered moieties. In the crystal structures of **1**, there was disordered nitrate anion of which occupancies was refined with free variables. In the crystal structures of compounds **2**, there were disordered nitrate anion and aromatic ring of H<sub>3</sub>L of which occupancies were refined with free variables, and there was disordered methanol molecule. Solvent-accessible void volume was calculated using Olex2.<sup>3</sup> The crystallographic data are summarized in Table S4.

## References

1. (a) *SMART, SAINT, and XPREP, Area Detector Control and Data Integration and Reduction Software*, Bruker Analytical X-ray Instruments Inc., Madison, WI, 1995. (b) Sheldrick, G. M. *SADABS, Empirical Absorption Correction Program for Area Detector Data*, University of Göttingen, Germany, 1996.
2. Sheldrick, G. M. *SHELX-97, Program for Crystal Structure Analysis*, University of Göttingen, Germany, 1998.

3. O. V. Dolomanov, L. J. Bourhis, R. J. Gildea, J. A. K. Howard, H. Puschmann, *J. Appl. Cryst.*, 2009, **42**, 339.

## 2. Additional Data

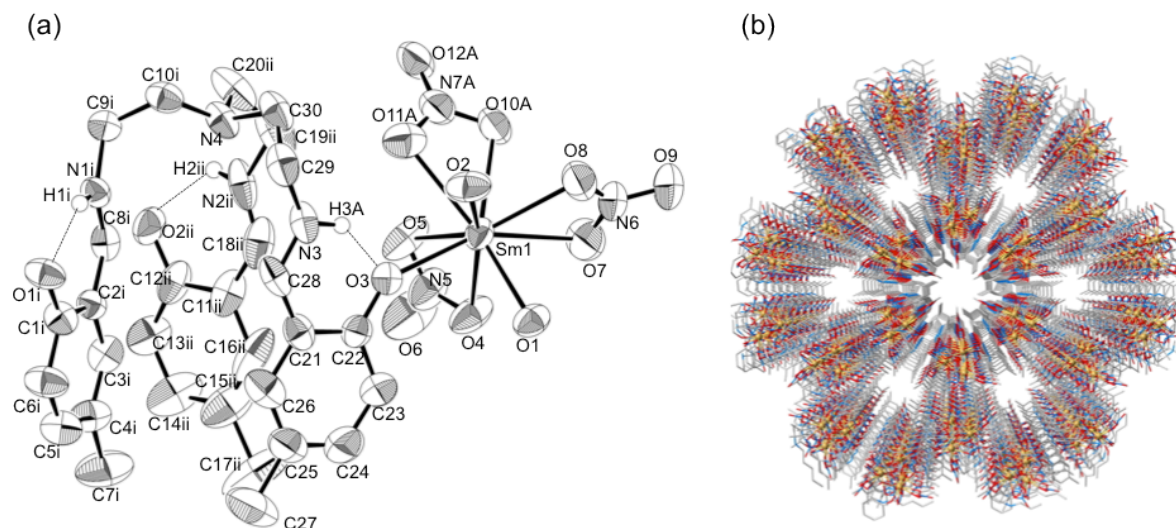

Fig. S1 (a) ORTEP diagram of **1** with numbering, showing only the atoms O10A, N7A, O11A, and O12A of the disordered nitrate anion, and the atoms C15A, C16A, and C17A of the disordered aromatic ring. Symmetry codes: i:  $4/3-y, 2/3+x-y, -1/3+z$ , ii:  $1/3+x-y, -1/3+x, 5/3-z$ . Open circles represent imino proton. All other hydrogen atoms and crystal solvents are omitted for clarity. (b) View along *c* axis for 3D framework of **1**. Orange balls represent Sm(III) ions. Gray, blue, and red sticks represent bonds from carbon, nitrogen, and oxygen atoms, respectively. Hydrogen atoms and crystal solvents are omitted for clarity.

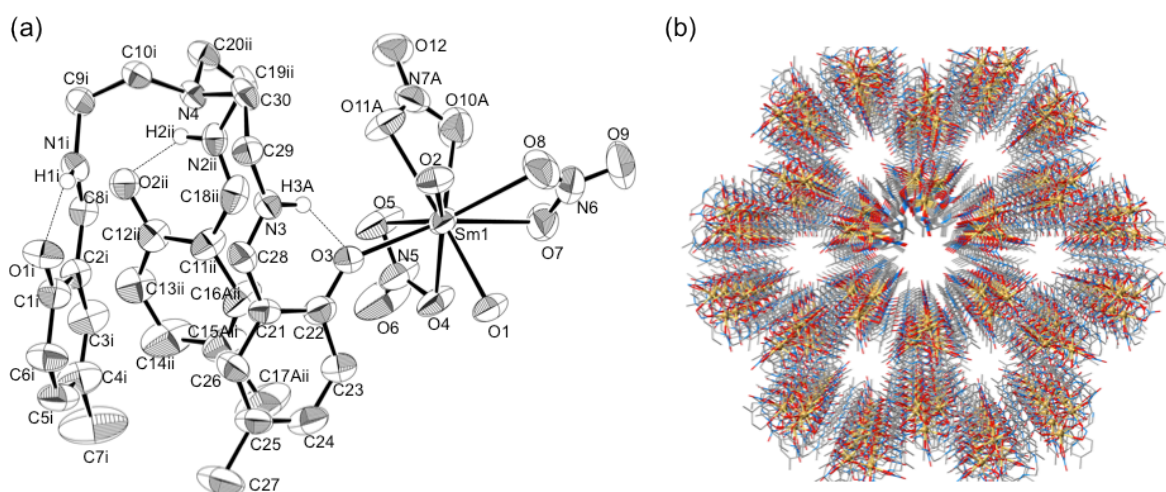

Fig. S2 (a) ORTEP diagram of **2** with numbering, showing only the atoms O10A, N7A, O11A, and O12A of the disordered nitrate anion, and the atoms C15A, C16A, and C17A of the disordered aromatic ring. Symmetry codes: i:  $1/3-y$ ,  $2/3+x-y$ ,  $-1/3+z$ , ii:  $+x-y$ ,  $+x$ ,  $-z$ . Open circles represent imino proton. All other hydrogen atoms and crystal solvents are omitted for clarity. (b) View along  $c$  axis for 3D framework of **2**. Orange balls represent Sm(III) ions. Gray, blue, and red sticks represent bonds from carbon, nitrogen, and oxygen atoms, respectively. Hydrogen atoms and crystal solvents are omitted for clarity.

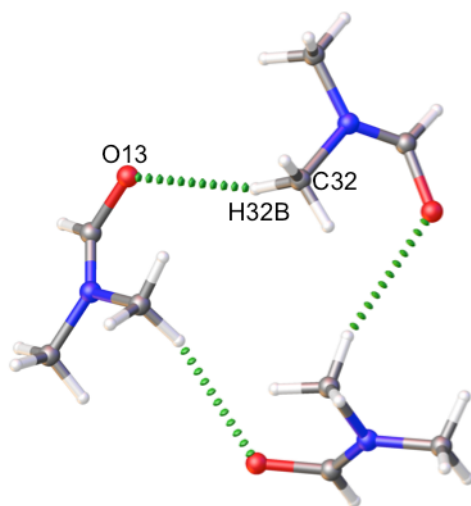

Fig. S3 Relative orientation of the DMF guests in **1**. View along  $c$  axis. Green dotted line represents  $\text{CH}\cdots\text{O}$  hydrogen bond.

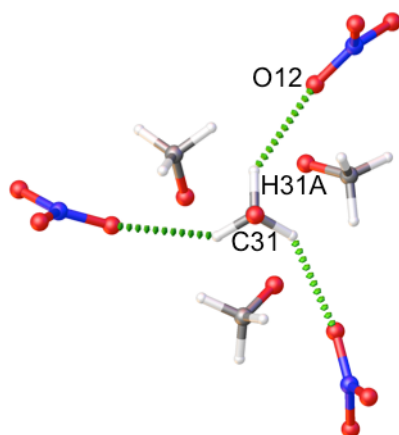

Fig. S4 Interaction between the nitrate anions of framework and the methanol guest in **2**. View along *c* axis. Green dotted line represents CH $\cdots$ O hydrogen bond. The methanol molecule shows locational disorder.

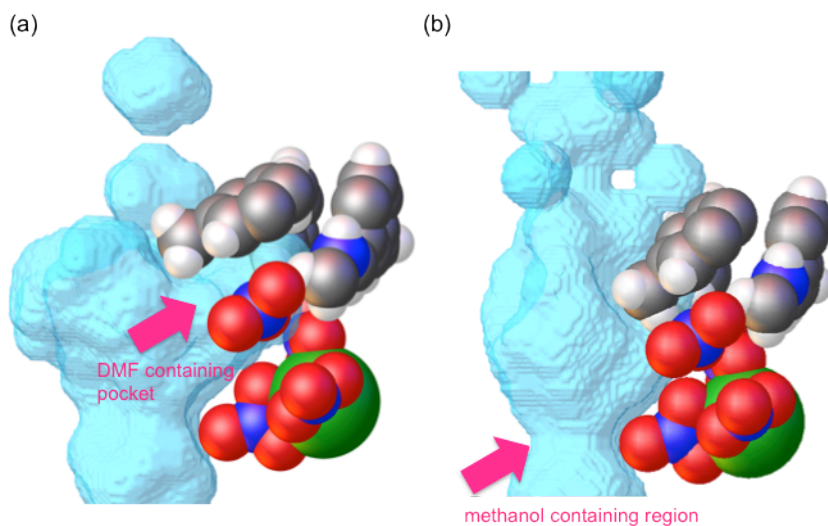

Fig. S5 Depiction of hydrophobic and hydrophilic voids. (a) Voids surface in the vicinity of the DMF containing pocket for **1**. (b) Voids surface for **2**, showing that the space corresponding to the pocket observed in **1** is packed by the methyl group of H<sub>3</sub>L and nitrate anion to prevent the solvent from accessing. The surface of the void is shown in light blue. H: white, C: gray, O: red, N: blue, Sm: green.

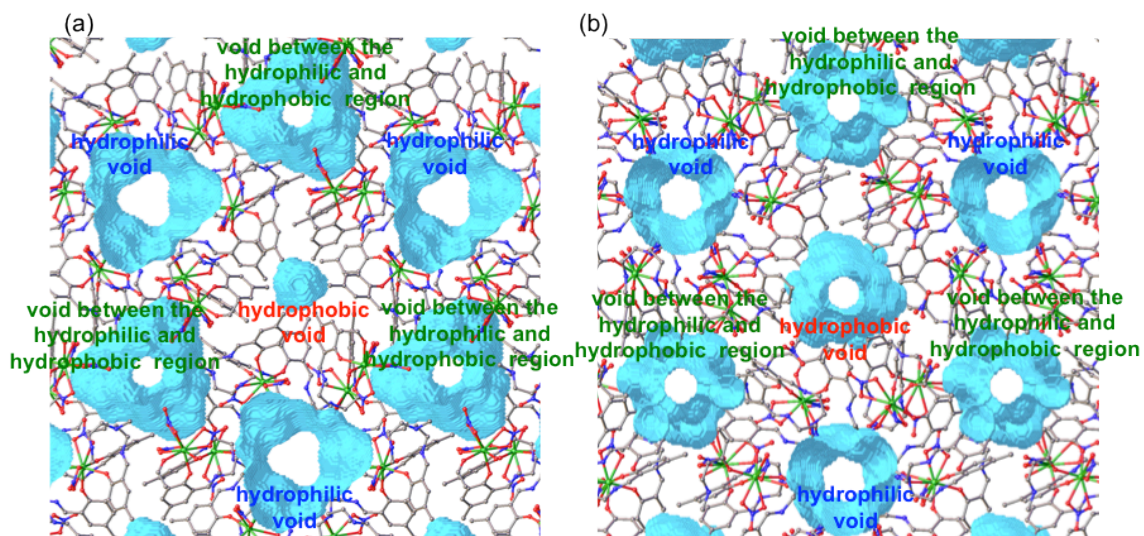

Fig. S6 Spatial arrangement of the hydrophobic and hydrophilic voids in *ab* plane for (a) **1** and (b) **2**. The surface of the void is shown in light blue.

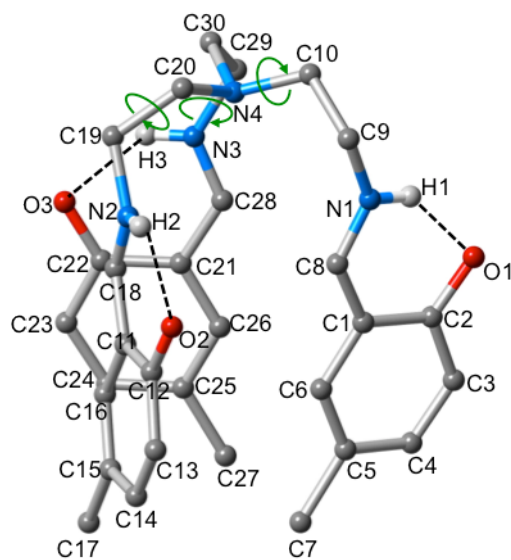

Fig. S7 Schematic drawing of twist in  $H_3L$ .

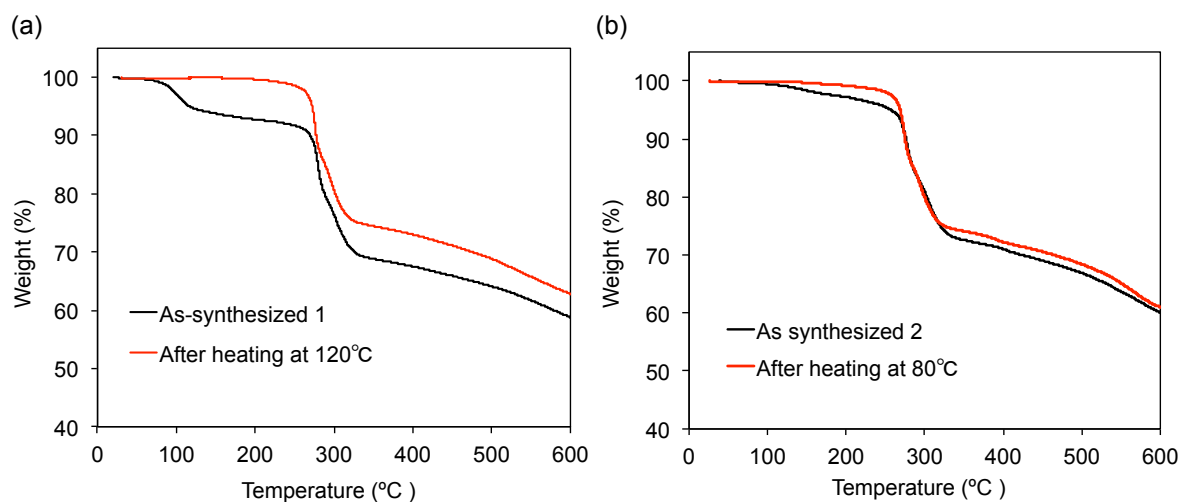

Fig. S8 TGA profiles for (a) **1** and (b) **2**. (black line: as-synthesized sample, red line: dried sample that is prepared by heating at 120 °C for **1** and 80 °C for **2** for 3 hr.)

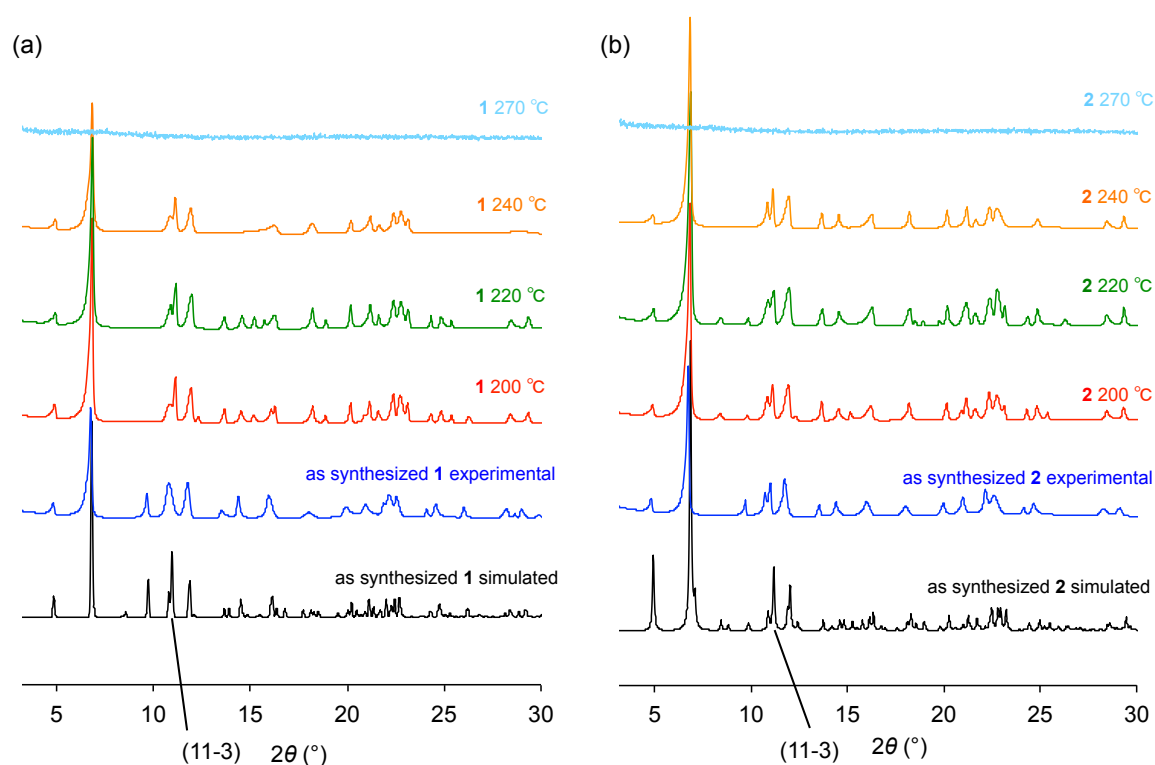

Fig. S9 Experimental and simulated PXRD patterns of (a) **1** and (b) **2**. (black line: simulated pattern from single-crystal X-ray data, blue line: as-synthesized sample, red, green, orange, pale blue, and pink line: dried sample that is prepared by heating at 200, 220, 240 and 270 °C for 15 min.)

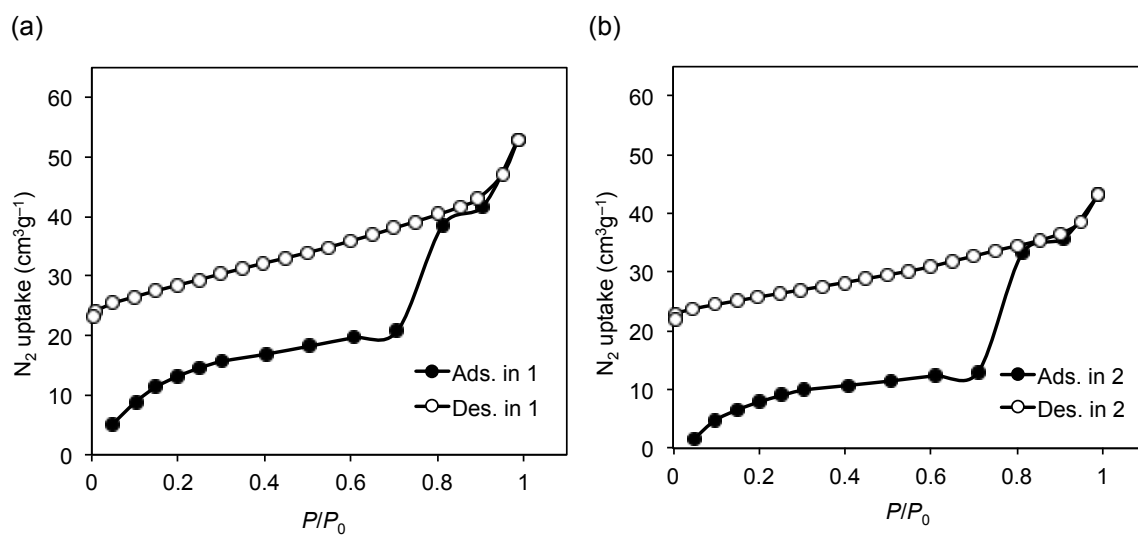

Fig. S10  $N_2$  adsorption and desorption isotherms of (a) **1** and (b) **2** at 77 K.

Table S1. CH $\cdots$ O hydrogen bond between the framework and the guest solvents and classical NH $\cdots$ O hydrogen bonds for compounds **1** and **2**.

| Compound                      | H-bond                 | H $\cdots$ A | D $\cdots$ A | D–H $\cdots$ A |
|-------------------------------|------------------------|--------------|--------------|----------------|
| <b>CH<math>\cdots</math>O</b> |                        |              |              |                |
| <b>1</b>                      | C9–H9A $\cdots$ O13    | 2.57         | 3.316(15)    | 132            |
| <b>1</b>                      | C17–H17 $\cdots$ O13   | 2.71         | 3.411(17)    | 129            |
| <b>1</b>                      | C32–H32A $\cdots$ O10A | 2.81         | 3.44(4)      | 123            |
| <b>1</b>                      | C32–H32A $\cdots$ O12A | 3.00         | 3.88(5)      | 152            |
| <b>1</b>                      | C31–H31 $\cdots$ O6    | 2.81         | 3.053(17)    | 94             |
| <b>1</b>                      | C31–H31A $\cdots$ O6   | 2.81         | 3.053(17)    | 94             |
| <b>1</b>                      | C31–H31B $\cdots$ O6   | 3.00         | 3.053(17)    | 83             |
| <b>1</b>                      | C32–H32B $\cdots$ O13  | 2.71         | 3.67(3)      | 170            |
| <b>2</b>                      | C31–H31A $\cdots$ O12  | 2.69         | 3.54(2)      | 145            |
| <b>NH<math>\cdots</math>O</b> |                        |              |              |                |
| <b>1</b>                      | N1–H1 $\cdots$ O1      | 1.90(5)      | 2.648(7)     | 143(7)         |
| <b>1</b>                      | N2–H2 $\cdots$ O2      | 2.02(6)      | 2.606(8)     | 123(6)         |
| <b>1</b>                      | N3–H3A $\cdots$ O3     | 1.90(4)      | 2.625(8)     | 140(6)         |
| <b>1</b>                      | N1–H1 $\cdots$ O4      | 2.41(6)      | 3.029(8)     | 128(6)         |
| <b>1</b>                      | N2–H2 $\cdots$ O11A    | 2.35(7)      | 3.15(6)      | 140(6)         |
| <b>2</b>                      | N1–H1 $\cdots$ O1      | 1.89(3)      | 2.630(6)     | 141(4)         |
| <b>2</b>                      | N2–H2 $\cdots$ O2      | 1.87(3)      | 2.615(6)     | 142(4)         |
| <b>2</b>                      | N3–H3A $\cdots$ O3     | 1.94(5)      | 2.672(6)     | 140(6)         |
| <b>2</b>                      | N1–H1 $\cdots$ O4      | 2.32(4)      | 3.005(6)     | 135(4)         |
| <b>2</b>                      | N2–H2 $\cdots$ O11A    | 2.35(4)      | 2.975(19)    | 129(4)         |

Table S2. Selected bond distances (Å) for compounds **1** and **2**.

|          | <b>1</b> | <b>2</b>  |
|----------|----------|-----------|
| Sm1–O1   | 2.307(5) | 2.313(4)  |
| Sm1–O2   | 2.337(5) | 2.334(4)  |
| Sm1–O3   | 2.328(5) | 2.354(4)  |
| Sm1–O4   | 2.483(5) | 2.477(4)  |
| Sm1–O5   | 2.574(6) | 2.545(4)  |
| Sm1–O7   | 2.548(6) | 2.523(4)  |
| Sm1–O8   | 2.450(6) | 2.490(4)  |
| Sm1–O10A | 2.58(2)  | 2.639(16) |
| Sm1–O11A | 2.56(6)  | 2.464(16) |

Table S3. Selected bond angles (deg) for compounds **1** and **2**.

|             | <b>1</b>   | <b>2</b>   |               | <b>1</b>  | <b>2</b>   |
|-------------|------------|------------|---------------|-----------|------------|
| O1-Sm1-O2   | 92.67(18)  | 90.73(14)  | O3-Sm1-O8     | 145.7(2)  | 148.05(16) |
| O1-Sm1-O3   | 86.53(18)  | 88.97(14)  | O3-Sm1-O10A   | 129.1(5)  | 124.8(5)   |
| O1-Sm1-O4   | 76.03(17)  | 72.83(13)  | O3-Sm1-O11A   | 90.1(7)   | 83.0(4)    |
| O1-Sm1-O5   | 123.68(18) | 122.17(14) | O4-Sm1-O5     | 49.82(17) | 50.37(13)  |
| O1-Sm1-O7   | 73.7(2)    | 77.76(16)  | O4-Sm1-O7     | 71.9(2)   | 72.21(16)  |
| O1-Sm1-O8   | 82.4(2)    | 84.51(16)  | O4-Sm1-O8     | 122.3(2)  | 121.93(16) |
| O1-Sm1-O10A | 139.3(5)   | 144.3(3)   | O4-Sm1-O10A   | 86.5(8)   | 96.4(7)    |
| O1-Sm1-O11A | 162.1(10)  | 162.4(4)   | O4-Sm1-O11A   | 121.3(9)  | 121.8(4)   |
| O2-Sm1-O3   | 76.29(18)  | 77.00(14)  | O5-Sm1-O7     | 99.0(2)   | 92.72(17)  |
| O2-Sm1-O4   | 159.4(2)   | 156.16(15) | O5-Sm1-O8     | 135.8(2)  | 131.39(18) |
| O2-Sm1-O5   | 132.33(19) | 137.71(14) | O5-Sm1-O10A   | 60.6(7)   | 62.9(8)    |
| O2-Sm1-O7   | 122.0(2)   | 121.99(16) | O5-Sm1-O11A   | 72.3(9)   | 71.4(4)    |
| O2-Sm1-O8   | 72.0(2)    | 71.86(16)  | O7-Sm1-O8     | 50.7(2)   | 50.71(16)  |
| O2-Sm1-O10A | 112.6(8)   | 106.8(7)   | O7-Sm1-O10A   | 65.9(5)   | 66.5(3)    |
| O2-Sm1-O11A | 68.8(14)   | 72.2(4)    | O7-Sm1-O11A   | 114.3(8)  | 114.7(3)   |
| O3-Sm1-O4   | 85.7(2)    | 85.37(14)  | O8-Sm1-O10A   | 76.4(6)   | 72.4(7)    |
| O3-Sm1-O5   | 76.5(2)    | 77.83(16)  | O8-Sm1-O11A   | 90.7(7)   | 94.0(4)    |
| O3-Sm1-O7   | 152.9(2)   | 156.43(15) | O10A-Sm1-O11A | 53.0(9)   | 48.7(5)    |

Table S4. Crystallographic data and structure refinement details.

| Complexes                                            | 1                                                                    | 2                                                                          |
|------------------------------------------------------|----------------------------------------------------------------------|----------------------------------------------------------------------------|
| Empirical formula                                    | C <sub>33</sub> H <sub>43</sub> N <sub>8</sub> O <sub>13.17</sub> Sm | C <sub>30.33</sub> H <sub>36.53</sub> N <sub>7</sub> O <sub>12.50</sub> Sm |
| Formula weight                                       | 912.82                                                               | 849.54                                                                     |
| Crystal system                                       | Trigonal                                                             | Trigonal                                                                   |
| Space group                                          | $R\bar{3}$                                                           | $R\bar{3}$                                                                 |
| $a / \text{\AA}$                                     | 25.917(3)                                                            | 25.758(4)                                                                  |
| $b / \text{\AA}$                                     | 25.917(3)                                                            | 25.758(4)                                                                  |
| $c / \text{\AA}$                                     | 30.915(4)                                                            | 30.055(4)                                                                  |
| $\alpha / ^\circ$                                    | 90                                                                   | 90                                                                         |
| $\beta / ^\circ$                                     | 90                                                                   | 90                                                                         |
| $\gamma / ^\circ$                                    | 120                                                                  | 120                                                                        |
| Volume / $\text{\AA}^3$                              | 17984(4)                                                             | 17269(4)                                                                   |
| $Z$                                                  | 18                                                                   | 18                                                                         |
| Density (calculated) / $\text{g}\cdot\text{cm}^{-3}$ | 1.517                                                                | 1.470                                                                      |
| Absorption coefficient / $\text{mm}^{-1}$            | 1.540                                                                | 1.596                                                                      |
| $F(000)$                                             | 8358                                                                 | 7732                                                                       |
| Crystal size / mm                                    | $0.10 \times 0.04 \times 0.02$                                       | $0.06 \times 0.02 \times 0.01$                                             |
| Crystal color                                        | Yellow                                                               | Yellow                                                                     |
| Reflections included in the refinement (total)       | 25854                                                                | 33105                                                                      |
| Independent reflections                              | 6060<br>[ $R(\text{int}) = 0.0641$ ]                                 | 8782<br>[ $R(\text{int}) = 0.1044$ ]                                       |
| Reflections with [ $I > 2\sigma(I)$ ]                | 4329<br>[ $R(\text{int}) = 0.0569$ ]                                 | 4602<br>[ $R(\text{int}) = 0.1164$ ]                                       |
| Completeness to $\theta_{\text{max}} / \%$           | 100                                                                  | 99.5                                                                       |
| Refined parameters                                   | 552                                                                  | 551                                                                        |
| Final $R$ indices [all data]                         | $R_1 = 0.0790$<br>$wR_2 = 0.1380$                                    | $R_1 = 0.1306$<br>$wR_2 = 0.1239$                                          |
| Final $R$ indices [ $I > 2\sigma(I)$ ]               | $R_1 = 0.0496$<br>$wR_2 = 0.1197$                                    | $R_1 = 0.0502$<br>$wR_2 = 0.0925$                                          |
| GOF on $F^2$                                         | 1.049                                                                | 1.003                                                                      |
| $r(\text{max, min}) / \text{e}\cdot\text{\AA}^{-3}$  | 1.017, -0.775                                                        | 0.780, -0.882                                                              |
